# Supplementary material
Source: publisher figshare collection journal article supplement (https://frontiersin.figshare.com/ndownloader/files/12245783)
Supplement: Supplementary file 1 [file 12245783]

Table S2: Surface area and volume of cyanobacterial bundle, as well as water in its 0-32 µm microenvironment during desiccation.

| Time in min | Bundle Surface in mm² | Bundle Volume in nL | Water around bundle in nL |
| --- | --- | --- | --- |
| 42 | 1.00 | 48.25 | 17.82 |
| 51 | 0.96 | 45.43 | 10.17 |
| 61 | 1.00 | 48.77 | 4.24 |
| 91 | 0.82 | 34.08 | 0.00 |
| 118 | 0.82 | 32.76 | 0.00 |
| 164 | 0.83 | 30.61 | 0.00 |
| 182 | 0.81 | 32.03 | 0.00 |
